# Supplementary material for: Meta-Analysis of Heifer Traits Identified Reproductive Pathways in Bos indicus Cattle
Source: MDPI journal article supplement (doi:10.3390/genes12050768), 2021-05-18
Supplement: s1 [file s1]

Table S4: **DAVID Classified KEGG Pathways and GOTERM Biological Processes**

| <b>Significantly enriched pathways using trained fertility related background gene list</b> |                                                  |            |          |           |
|---------------------------------------------------------------------------------------------|--------------------------------------------------|------------|----------|-----------|
| Category                                                                                    | Term                                             | Gene Count | P-Value  | Benjamini |
| KEGG_PATHWAY                                                                                | Calcium signaling pathway                        | 26         | 1.90E-07 | 3.60E-05  |
| KEGG_PATHWAY                                                                                | cAMP signaling pathway                           | 24         | 2.10E-06 | 1.80E-04  |
| KEGG_PATHWAY                                                                                | Rap1 signaling pathway                           | 20         | 2.80E-06 | 1.80E-04  |
| KEGG_PATHWAY                                                                                | Focal adhesion                                   | 25         | 1.20E-05 | 5.60E-04  |
| KEGG_PATHWAY                                                                                | Ras signaling pathway                            | 18         | 2.70E-05 | 9.30E-04  |
| KEGG_PATHWAY                                                                                | Cholinergic synapse                              | 17         | 2.90E-05 | 9.30E-04  |
| KEGG_PATHWAY                                                                                | Neuroactive ligand-receptor interaction          | 17         | 4.30E-05 | 1.10E-03  |
| KEGG_PATHWAY                                                                                | MAPK signaling pathway                           | 17         | 4.80E-05 | 1.10E-03  |
| KEGG_PATHWAY                                                                                | GnRH signaling pathway                           | 16         | 6.00E-05 | 1.20E-03  |
| KEGG_PATHWAY                                                                                | Regulation of actin cytoskeleton                 | 25         | 6.70E-05 | 1.20E-03  |
| KEGG_PATHWAY                                                                                | Estrogen signaling pathway                       | 17         | 7.00E-05 | 1.20E-03  |
| KEGG_PATHWAY                                                                                | Tuberculosis                                     | 10         | 1.00E-04 | 1.60E-03  |
| KEGG_PATHWAY                                                                                | PI3K-Akt signaling pathway                       | 40         | 1.10E-04 | 1.60E-03  |
| KEGG_PATHWAY                                                                                | Proteoglycans in cancer                          | 16         | 1.30E-04 | 1.80E-03  |
| KEGG_PATHWAY                                                                                | Pathways in cancer                               | 21         | 1.60E-04 | 2.10E-03  |
| KEGG_PATHWAY                                                                                | Prostate cancer                                  | 11         | 2.40E-04 | 2.90E-03  |
| KEGG_PATHWAY                                                                                | Choline metabolism in cancer                     | 11         | 3.20E-04 | 3.60E-03  |
| KEGG_PATHWAY                                                                                | Ovarian steroidogenesis                          | 10         | 4.10E-04 | 4.20E-03  |
| KEGG_PATHWAY                                                                                | Inflammatory mediator regulation of TRP channels | 11         | 4.30E-04 | 4.20E-03  |
| KEGG_PATHWAY                                                                                | Alzheimer's disease                              | 8          | 4.40E-04 | 4.20E-03  |
| KEGG_PATHWAY                                                                                | Aldosterone synthesis and secretion              | 10         | 5.60E-04 | 5.10E-03  |
| KEGG_PATHWAY                                                                                | NOD-like receptor signaling pathway              | 6          | 6.20E-04 | 5.40E-03  |
| KEGG_PATHWAY                                                                                | Progesterone-mediated oocyte maturation          | 13         | 6.70E-04 | 5.60E-03  |
| KEGG_PATHWAY                                                                                | Dopaminergic synapse                             | 13         | 8.10E-04 | 5.90E-03  |
| KEGG_PATHWAY                                                                                | Platelet activation                              | 13         | 8.10E-04 | 5.90E-03  |
| KEGG_PATHWAY                                                                                | Glioma                                           | 9          | 8.20E-04 | 5.90E-03  |
| KEGG_PATHWAY                                                                                | Retrograde endocannabinoid signaling             | 12         | 8.40E-04 | 5.90E-03  |
| KEGG_PATHWAY                                                                                | Central carbon metabolism in cancer              | 8          | 9.70E-04 | 6.60E-03  |
| KEGG_PATHWAY                                                                                | Glutamatergic synapse                            | 15         | 1.10E-03 | 7.00E-03  |
| KEGG_PATHWAY                                                                                | cGMP-PKG signaling pathway                       | 14         | 1.10E-03 | 7.00E-03  |
| KEGG_PATHWAY                                                                                | T cell receptor signaling pathway                | 9          | 1.50E-03 | 9.10E-03  |
| KEGG_PATHWAY                                                                                | ErbB signaling pathway                           | 10         | 1.60E-03 | 9.50E-03  |
| KEGG_PATHWAY                                                                                | Glucagon signaling pathway                       | 10         | 1.60E-03 | 9.50E-03  |
| KEGG_PATHWAY                                                                                | HTLV-I infection                                 | 12         | 1.70E-03 | 9.80E-03  |
| KEGG_PATHWAY                                                                                | Neurotrophin signaling pathway                   | 10         | 1.80E-03 | 1.00E-02  |
| KEGG_PATHWAY                                                                                | Adrenergic signaling in cardiomyocytes           | 11         | 2.00E-03 | 1.10E-02  |
| KEGG_PATHWAY                                                                                | Vascular smooth muscle contraction               | 10         | 2.10E-03 | 1.10E-02  |
| KEGG_PATHWAY                                                                                | Fc epsilon RI signaling pathway                  | 8          | 2.20E-03 | 1.10E-02  |

|                                                                                                                                   |                                                          |     |          |          |
|-----------------------------------------------------------------------------------------------------------------------------------|----------------------------------------------------------|-----|----------|----------|
| KEGG_PATHWAY                                                                                                                      | Metabolic pathways                                       | 11  | 2.30E-03 | 1.10E-02 |
| KEGG_PATHWAY                                                                                                                      | Oxytocin signaling pathway                               | 12  | 2.50E-03 | 1.20E-02 |
| KEGG_PATHWAY                                                                                                                      | Hepatitis C                                              | 8   | 2.60E-03 | 1.20E-02 |
| KEGG_PATHWAY                                                                                                                      | Long-term depression                                     | 8   | 2.60E-03 | 1.20E-02 |
| KEGG_PATHWAY                                                                                                                      | Long-term potentiation                                   | 9   | 2.90E-03 | 1.30E-02 |
| KEGG_PATHWAY                                                                                                                      | Natural killer cell mediated cytotoxicity                | 8   | 3.00E-03 | 1.30E-02 |
| KEGG_PATHWAY                                                                                                                      | Leishmaniasis                                            | 6   | 3.00E-03 | 1.30E-02 |
| KEGG_PATHWAY                                                                                                                      | TNF signaling pathway                                    | 8   | 3.90E-03 | 1.60E-02 |
| KEGG_PATHWAY                                                                                                                      | Circadian entrainment                                    | 10  | 4.40E-03 | 1.80E-02 |
| KEGG_PATHWAY                                                                                                                      | Prolactin signaling pathway                              | 8   | 5.00E-03 | 2.00E-02 |
| KEGG_PATHWAY                                                                                                                      | Gap junction                                             | 8   | 5.00E-03 | 2.00E-02 |
| KEGG_PATHWAY                                                                                                                      | Huntington's disease                                     | 6   | 6.40E-03 | 2.40E-02 |
| KEGG_PATHWAY                                                                                                                      | Melanoma                                                 | 8   | 6.40E-03 | 2.40E-02 |
| KEGG_PATHWAY                                                                                                                      | Amoebiasis                                               | 9   | 7.00E-03 | 2.60E-02 |
| KEGG_PATHWAY                                                                                                                      | Toxoplasmosis                                            | 8   | 7.20E-03 | 2.60E-02 |
| KEGG_PATHWAY                                                                                                                      | Pertussis                                                | 6   | 7.50E-03 | 2.70E-02 |
| KEGG_PATHWAY                                                                                                                      | Pancreatic cancer                                        | 7   | 7.80E-03 | 2.70E-02 |
| KEGG_PATHWAY                                                                                                                      | HIF-1 signaling pathway                                  | 8   | 8.00E-03 | 2.70E-02 |
| KEGG_PATHWAY                                                                                                                      | Chagas disease (American trypanosomiasis)                | 8   | 1.00E-02 | 3.20E-02 |
| KEGG_PATHWAY                                                                                                                      | Influenza A                                              | 7   | 1.00E-02 | 3.20E-02 |
| KEGG_PATHWAY                                                                                                                      | Serotonergic synapse                                     | 11  | 1.00E-02 | 3.20E-02 |
| KEGG_PATHWAY                                                                                                                      | Chemokine signaling pathway                              | 10  | 1.10E-02 | 3.40E-02 |
| KEGG_PATHWAY                                                                                                                      | Toll-like receptor signaling pathway                     | 6   | 1.20E-02 | 3.70E-02 |
| KEGG_PATHWAY                                                                                                                      | Signaling pathways regulating pluripotency of stem cells | 8   | 1.20E-02 | 3.80E-02 |
| KEGG_PATHWAY                                                                                                                      | RIG-I-like receptor signaling pathway                    | 4   | 1.30E-02 | 3.90E-02 |
| KEGG_PATHWAY                                                                                                                      | Epstein-Barr virus infection                             | 6   | 1.40E-02 | 4.10E-02 |
| KEGG_PATHWAY                                                                                                                      | Osteoclast differentiation                               | 7   | 1.60E-02 | 4.60E-02 |
| KEGG_PATHWAY                                                                                                                      | VEGF signaling pathway                                   | 7   | 1.60E-02 | 4.60E-02 |
| <b>All classified KEGG biological pathways (Gene Count =&gt;6) using default <i>Bos. taurus</i> background gene list of DAVID</b> |                                                          |     |          |          |
| KEGG_PATHWAY                                                                                                                      | Metabolic pathways                                       | 126 | 4.40E-01 | 1.00E+00 |
| KEGG_PATHWAY                                                                                                                      | Olfactory transduction                                   | 86  | 9.90E-01 | 1.00E+00 |
| KEGG_PATHWAY                                                                                                                      | Pathways in cancer                                       | 46  | 2.00E-01 | 9.00E-01 |
| KEGG_PATHWAY                                                                                                                      | Neuroactive ligand-receptor interaction                  | 42  | 1.40E-02 | 7.80E-01 |
| KEGG_PATHWAY                                                                                                                      | PI3K-Akt signaling pathway                               | 40  | 2.30E-01 | 9.70E-01 |
| KEGG_PATHWAY                                                                                                                      | Ras signaling pathway                                    | 34  | 2.60E-02 | 7.80E-01 |
| KEGG_PATHWAY                                                                                                                      | Rap1 signaling pathway                                   | 32  | 2.00E-02 | 7.80E-01 |
| KEGG_PATHWAY                                                                                                                      | MAPK signaling pathway                                   | 32  | 1.40E-01 | 8.20E-01 |
| KEGG_PATHWAY                                                                                                                      | Cytokine-cytokine receptor interaction                   | 29  | 9.40E-02 | 7.80E-01 |
| KEGG_PATHWAY                                                                                                                      | Chemokine signaling pathway                              | 27  | 4.40E-02 | 7.80E-01 |
| KEGG_PATHWAY                                                                                                                      | Focal adhesion                                           | 27  | 1.30E-01 | 8.00E-01 |
| KEGG_PATHWAY                                                                                                                      | Calcium signaling pathway                                | 26  | 8.40E-02 | 7.80E-01 |
| KEGG_PATHWAY                                                                                                                      | Proteoglycans in cancer                                  | 26  | 1.50E-01 | 8.50E-01 |

|              |                                                  |    |          |          |
|--------------|--------------------------------------------------|----|----------|----------|
| KEGG_PATHWAY | Purine metabolism                                | 25 | 6.80E-02 | 7.80E-01 |
| KEGG_PATHWAY | cAMP signaling pathway                           | 25 | 1.80E-01 | 8.70E-01 |
| KEGG_PATHWAY | Regulation of actin cytoskeleton                 | 25 | 2.80E-01 | 1.00E+00 |
| KEGG_PATHWAY | Tuberculosis                                     | 24 | 1.30E-01 | 8.00E-01 |
| KEGG_PATHWAY | Choline metabolism in cancer                     | 22 | 6.00E-04 | 1.70E-01 |
| KEGG_PATHWAY | Hepatitis C                                      | 21 | 3.90E-02 | 7.80E-01 |
| KEGG_PATHWAY | Oxytocin signaling pathway                       | 21 | 8.20E-02 | 7.80E-01 |
| KEGG_PATHWAY | Influenza A                                      | 21 | 2.70E-01 | 1.00E+00 |
| KEGG_PATHWAY | Viral carcinogenesis                             | 21 | 8.00E-01 | 1.00E+00 |
| KEGG_PATHWAY | Vascular smooth muscle contraction               | 20 | 2.50E-02 | 7.80E-01 |
| KEGG_PATHWAY | Protein processing in endoplasmic reticulum      | 20 | 3.20E-01 | 1.00E+00 |
| KEGG_PATHWAY | Biosynthesis of antibiotics                      | 20 | 6.70E-01 | 1.00E+00 |
| KEGG_PATHWAY | Endocytosis                                      | 19 | 9.30E-01 | 1.00E+00 |
| KEGG_PATHWAY | HTLV-I infection                                 | 19 | 9.80E-01 | 1.00E+00 |
| KEGG_PATHWAY | Platelet activation                              | 18 | 1.30E-01 | 8.00E-01 |
| KEGG_PATHWAY | Dopaminergic synapse                             | 18 | 1.30E-01 | 8.00E-01 |
| KEGG_PATHWAY | cGMP-PKG signaling pathway                       | 18 | 4.10E-01 | 1.00E+00 |
| KEGG_PATHWAY | Transcriptional misregulation in cancer          | 18 | 5.40E-01 | 1.00E+00 |
| KEGG_PATHWAY | Estrogen signaling pathway                       | 17 | 3.20E-02 | 7.80E-01 |
| KEGG_PATHWAY | T cell receptor signaling pathway                | 17 | 5.50E-02 | 7.80E-01 |
| KEGG_PATHWAY | Cholinergic synapse                              | 17 | 7.70E-02 | 7.80E-01 |
| KEGG_PATHWAY | Epstein-Barr virus infection                     | 17 | 1.20E-01 | 8.00E-01 |
| KEGG_PATHWAY | Neurotrophin signaling pathway                   | 17 | 1.80E-01 | 8.70E-01 |
| KEGG_PATHWAY | FoxO signaling pathway                           | 17 | 2.40E-01 | 9.70E-01 |
| KEGG_PATHWAY | Adrenergic signaling in cardiomyocytes           | 17 | 2.80E-01 | 1.00E+00 |
| KEGG_PATHWAY | Jak-STAT signaling pathway                       | 17 | 4.30E-01 | 1.00E+00 |
| KEGG_PATHWAY | Cell adhesion molecules (CAMs)                   | 17 | 4.70E-01 | 1.00E+00 |
| KEGG_PATHWAY | GnRH signaling pathway                           | 16 | 2.10E-02 | 7.80E-01 |
| KEGG_PATHWAY | Prostate cancer                                  | 16 | 2.10E-02 | 7.80E-01 |
| KEGG_PATHWAY | Gap junction                                     | 16 | 2.80E-02 | 7.80E-01 |
| KEGG_PATHWAY | Pyrimidine metabolism                            | 16 | 5.90E-02 | 7.80E-01 |
| KEGG_PATHWAY | Inflammatory mediator regulation of TRP channels | 16 | 9.00E-02 | 7.80E-01 |
| KEGG_PATHWAY | Glutamatergic synapse                            | 16 | 1.50E-01 | 8.50E-01 |
| KEGG_PATHWAY | Leukocyte transendothelial migration             | 16 | 1.80E-01 | 8.70E-01 |
| KEGG_PATHWAY | Axon guidance                                    | 16 | 2.60E-01 | 1.00E+00 |
| KEGG_PATHWAY | Ribosome                                         | 16 | 3.50E-01 | 1.00E+00 |
| KEGG_PATHWAY | Osteoclast differentiation                       | 16 | 3.50E-01 | 1.00E+00 |
| KEGG_PATHWAY | Hepatitis B                                      | 16 | 5.10E-01 | 1.00E+00 |
| KEGG_PATHWAY | RNA transport                                    | 16 | 6.30E-01 | 1.00E+00 |
| KEGG_PATHWAY | Alzheimer's disease                              | 16 | 7.90E-01 | 1.00E+00 |
| KEGG_PATHWAY | Herpes simplex infection                         | 16 | 8.60E-01 | 1.00E+00 |
| KEGG_PATHWAY | Glycerophospholipid metabolism                   | 15 | 9.80E-02 | 7.80E-01 |
| KEGG_PATHWAY | Phosphatidylinositol signaling system            | 15 | 1.00E-01 | 7.90E-01 |
| KEGG_PATHWAY | TNF signaling pathway                            | 15 | 1.80E-01 | 8.80E-01 |

|              |                                                          |    |          |          |
|--------------|----------------------------------------------------------|----|----------|----------|
| KEGG_PATHWAY | Hippo signaling pathway                                  | 15 | 6.50E-01 | 1.00E+00 |
| KEGG_PATHWAY | Huntington's disease                                     | 15 | 9.40E-01 | 1.00E+00 |
| KEGG_PATHWAY | Long-term depression                                     | 14 | 4.50E-03 | 6.30E-01 |
| KEGG_PATHWAY | ErbB signaling pathway                                   | 14 | 8.20E-02 | 7.80E-01 |
| KEGG_PATHWAY | Pancreatic secretion                                     | 14 | 1.60E-01 | 8.50E-01 |
| KEGG_PATHWAY | Serotonergic synapse                                     | 14 | 3.70E-01 | 1.00E+00 |
| KEGG_PATHWAY | Sphingolipid signaling pathway                           | 14 | 4.20E-01 | 1.00E+00 |
| KEGG_PATHWAY | Insulin signaling pathway                                | 14 | 6.00E-01 | 1.00E+00 |
| KEGG_PATHWAY | Signaling pathways regulating pluripotency of stem cells | 14 | 6.40E-01 | 1.00E+00 |
| KEGG_PATHWAY | Alcoholism                                               | 14 | 9.90E-01 | 1.00E+00 |
| KEGG_PATHWAY | Glioma                                                   | 13 | 2.50E-02 | 7.80E-01 |
| KEGG_PATHWAY | Progesterone-mediated oocyte maturation                  | 13 | 1.60E-01 | 8.50E-01 |
| KEGG_PATHWAY | Circadian entrainment                                    | 13 | 2.50E-01 | 1.00E+00 |
| KEGG_PATHWAY | Retrograde endocannabinoid signaling                     | 13 | 3.40E-01 | 1.00E+00 |
| KEGG_PATHWAY | Toxoplasmosis                                            | 13 | 4.50E-01 | 1.00E+00 |
| KEGG_PATHWAY | AMPK signaling pathway                                   | 13 | 5.40E-01 | 1.00E+00 |
| KEGG_PATHWAY | Spliceosome                                              | 13 | 6.40E-01 | 1.00E+00 |
| KEGG_PATHWAY | Ubiquitin mediated proteolysis                           | 13 | 7.10E-01 | 1.00E+00 |
| KEGG_PATHWAY | Measles                                                  | 13 | 7.50E-01 | 1.00E+00 |
| KEGG_PATHWAY | Non-alcoholic fatty liver disease (NAFLD)                | 13 | 8.80E-01 | 1.00E+00 |
| KEGG_PATHWAY | MicroRNAs in cancer                                      | 13 | 1.00E+00 | 1.00E+00 |
| KEGG_PATHWAY | Central carbon metabolism in cancer                      | 12 | 4.00E-02 | 7.80E-01 |
| KEGG_PATHWAY | Pancreatic cancer                                        | 12 | 5.40E-02 | 7.80E-01 |
| KEGG_PATHWAY | Fc epsilon RI signaling pathway                          | 12 | 6.50E-02 | 7.80E-01 |
| KEGG_PATHWAY | B cell receptor signaling pathway                        | 12 | 8.40E-02 | 7.80E-01 |
| KEGG_PATHWAY | Melanoma                                                 | 12 | 9.80E-02 | 7.80E-01 |
| KEGG_PATHWAY | Arachidonic acid metabolism                              | 12 | 9.80E-02 | 7.80E-01 |
| KEGG_PATHWAY | Chronic myeloid leukemia                                 | 12 | 1.10E-01 | 7.90E-01 |
| KEGG_PATHWAY | Prolactin signaling pathway                              | 12 | 1.10E-01 | 8.00E-01 |
| KEGG_PATHWAY | Aldosterone synthesis and secretion                      | 12 | 1.60E-01 | 8.50E-01 |
| KEGG_PATHWAY | Salivary secretion                                       | 12 | 2.00E-01 | 9.00E-01 |
| KEGG_PATHWAY | Glucagon signaling pathway                               | 12 | 3.40E-01 | 1.00E+00 |
| KEGG_PATHWAY | Amoebiasis                                               | 12 | 5.60E-01 | 1.00E+00 |
| KEGG_PATHWAY | Parkinson's disease                                      | 12 | 9.00E-01 | 1.00E+00 |
| KEGG_PATHWAY | Long-term potentiation                                   | 11 | 1.10E-01 | 7.90E-01 |
| KEGG_PATHWAY | p53 signaling pathway                                    | 11 | 1.60E-01 | 8.50E-01 |
| KEGG_PATHWAY | Ribosome biogenesis in eukaryotes                        | 11 | 2.60E-01 | 1.00E+00 |
| KEGG_PATHWAY | Protein digestion and absorption                         | 11 | 3.20E-01 | 1.00E+00 |
| KEGG_PATHWAY | Hematopoietic cell lineage                               | 11 | 4.30E-01 | 1.00E+00 |
| KEGG_PATHWAY | HIF-1 signaling pathway                                  | 11 | 4.90E-01 | 1.00E+00 |
| KEGG_PATHWAY | Thyroid hormone signaling pathway                        | 11 | 7.00E-01 | 1.00E+00 |
| KEGG_PATHWAY | Chagas disease (American trypanosomiasis)                | 11 | 7.10E-01 | 1.00E+00 |
| KEGG_PATHWAY | Natural killer cell mediated cytotoxicity                | 11 | 7.40E-01 | 1.00E+00 |

|              |                                              |    |          |          |
|--------------|----------------------------------------------|----|----------|----------|
| KEGG_PATHWAY | Ovarian steroidogenesis                      | 10 | 5.60E-02 | 7.80E-01 |
| KEGG_PATHWAY | Fanconi anemia pathway                       | 10 | 6.90E-02 | 7.80E-01 |
| KEGG_PATHWAY | VEGF signaling pathway                       | 10 | 1.30E-01 | 8.00E-01 |
| KEGG_PATHWAY | Colorectal cancer                            | 10 | 2.10E-01 | 9.00E-01 |
| KEGG_PATHWAY | Adipocytokine signaling pathway              | 10 | 2.70E-01 | 1.00E+00 |
| KEGG_PATHWAY | Inositol phosphate metabolism                | 10 | 2.70E-01 | 1.00E+00 |
| KEGG_PATHWAY | Pertussis                                    | 10 | 3.60E-01 | 1.00E+00 |
| KEGG_PATHWAY | Insulin secretion                            | 10 | 4.30E-01 | 1.00E+00 |
| KEGG_PATHWAY | Small cell lung cancer                       | 10 | 5.00E-01 | 1.00E+00 |
| KEGG_PATHWAY | Insulin resistance                           | 10 | 7.90E-01 | 1.00E+00 |
| KEGG_PATHWAY | Oocyte meiosis                               | 10 | 8.10E-01 | 1.00E+00 |
| KEGG_PATHWAY | Lysosome                                     | 10 | 8.90E-01 | 1.00E+00 |
| KEGG_PATHWAY | Wnt signaling pathway                        | 10 | 9.40E-01 | 1.00E+00 |
| KEGG_PATHWAY | Ether lipid metabolism                       | 9  | 9.00E-02 | 7.80E-01 |
| KEGG_PATHWAY | Non-small cell lung cancer                   | 9  | 1.90E-01 | 8.90E-01 |
| KEGG_PATHWAY | Steroid hormone biosynthesis                 | 9  | 2.00E-01 | 9.00E-01 |
| KEGG_PATHWAY | Apoptosis                                    | 9  | 2.70E-01 | 1.00E+00 |
| KEGG_PATHWAY | Renin secretion                              | 9  | 3.30E-01 | 1.00E+00 |
| KEGG_PATHWAY | Chemical carcinogenesis                      | 9  | 4.00E-01 | 1.00E+00 |
| KEGG_PATHWAY | Complement and coagulation cascades          | 9  | 4.60E-01 | 1.00E+00 |
| KEGG_PATHWAY | TGF-beta signaling pathway                   | 9  | 5.90E-01 | 1.00E+00 |
| KEGG_PATHWAY | Peroxisome                                   | 9  | 6.10E-01 | 1.00E+00 |
| KEGG_PATHWAY | Fc gamma R-mediated phagocytosis             | 9  | 6.20E-01 | 1.00E+00 |
| KEGG_PATHWAY | NF-kappa B signaling pathway                 | 9  | 7.00E-01 | 1.00E+00 |
| KEGG_PATHWAY | Morphine addiction                           | 9  | 7.20E-01 | 1.00E+00 |
| KEGG_PATHWAY | Melanogenesis                                | 9  | 7.80E-01 | 1.00E+00 |
| KEGG_PATHWAY | Carbon metabolism                            | 9  | 8.60E-01 | 1.00E+00 |
| KEGG_PATHWAY | Cell cycle                                   | 9  | 9.40E-01 | 1.00E+00 |
| KEGG_PATHWAY | Phagosome                                    | 9  | 9.90E-01 | 1.00E+00 |
| KEGG_PATHWAY | NOD-like receptor signaling pathway          | 8  | 2.40E-01 | 9.70E-01 |
| KEGG_PATHWAY | Endometrial cancer                           | 8  | 2.40E-01 | 9.70E-01 |
| KEGG_PATHWAY | Acute myeloid leukemia                       | 8  | 3.20E-01 | 1.00E+00 |
| KEGG_PATHWAY | Metabolism of xenobiotics by cytochrome P450 | 8  | 3.70E-01 | 1.00E+00 |
| KEGG_PATHWAY | Renal cell carcinoma                         | 8  | 4.90E-01 | 1.00E+00 |
| KEGG_PATHWAY | Thyroid hormone synthesis                    | 8  | 5.40E-01 | 1.00E+00 |
| KEGG_PATHWAY | Gastric acid secretion                       | 8  | 5.80E-01 | 1.00E+00 |
| KEGG_PATHWAY | RNA degradation                              | 8  | 6.40E-01 | 1.00E+00 |
| KEGG_PATHWAY | Salmonella infection                         | 8  | 7.30E-01 | 1.00E+00 |
| KEGG_PATHWAY | ECM-receptor interaction                     | 8  | 7.80E-01 | 1.00E+00 |
| KEGG_PATHWAY | Rheumatoid arthritis                         | 8  | 8.50E-01 | 1.00E+00 |
| KEGG_PATHWAY | Mucin type O-Glycan biosynthesis             | 7  | 9.20E-02 | 7.80E-01 |
| KEGG_PATHWAY | Bladder cancer                               | 7  | 2.00E-01 | 9.00E-01 |
| KEGG_PATHWAY | Proteasome                                   | 7  | 3.10E-01 | 1.00E+00 |
| KEGG_PATHWAY | Glutathione metabolism                       | 7  | 4.50E-01 | 1.00E+00 |
| KEGG_PATHWAY | Lysine degradation                           | 7  | 4.50E-01 | 1.00E+00 |

|              |                                                        |   |          |          |
|--------------|--------------------------------------------------------|---|----------|----------|
| KEGG_PATHWAY | Amyotrophic lateral sclerosis (ALS)                    | 7 | 4.50E-01 | 1.00E+00 |
| KEGG_PATHWAY | Glycerolipid metabolism                                | 7 | 6.10E-01 | 1.00E+00 |
| KEGG_PATHWAY | Synaptic vesicle cycle                                 | 7 | 6.10E-01 | 1.00E+00 |
| KEGG_PATHWAY | Biosynthesis of amino acids                            | 7 | 7.20E-01 | 1.00E+00 |
| KEGG_PATHWAY | Hypertrophic cardiomyopathy (HCM)                      | 7 | 8.20E-01 | 1.00E+00 |
| KEGG_PATHWAY | Dilated cardiomyopathy                                 | 7 | 8.70E-01 | 1.00E+00 |
| KEGG_PATHWAY | Tight junction                                         | 7 | 8.80E-01 | 1.00E+00 |
| KEGG_PATHWAY | Toll-like receptor signaling pathway                   | 7 | 9.60E-01 | 1.00E+00 |
| KEGG_PATHWAY | DNA replication                                        | 6 | 2.90E-01 | 1.00E+00 |
| KEGG_PATHWAY | Nicotine addiction                                     | 6 | 4.10E-01 | 1.00E+00 |
| KEGG_PATHWAY | Legionellosis                                          | 6 | 6.80E-01 | 1.00E+00 |
| KEGG_PATHWAY | Arrhythmogenic right ventricular cardiomyopathy (ARVC) | 6 | 7.90E-01 | 1.00E+00 |
| KEGG_PATHWAY | Amphetamine addiction                                  | 6 | 8.10E-01 | 1.00E+00 |
| KEGG_PATHWAY | Adherens junction                                      | 6 | 8.20E-01 | 1.00E+00 |
| KEGG_PATHWAY | Viral myocarditis                                      | 6 | 8.30E-01 | 1.00E+00 |
| KEGG_PATHWAY | PPAR signaling pathway                                 | 6 | 8.40E-01 | 1.00E+00 |
| KEGG_PATHWAY | Inflammatory bowel disease (IBD)                       | 6 | 8.40E-01 | 1.00E+00 |
| KEGG_PATHWAY | Leishmaniasis                                          | 6 | 8.50E-01 | 1.00E+00 |
| KEGG_PATHWAY | RIG-I-like receptor signaling pathway                  | 6 | 8.90E-01 | 1.00E+00 |
| KEGG_PATHWAY | Bacterial invasion of epithelial cells                 | 6 | 8.90E-01 | 1.00E+00 |
| KEGG_PATHWAY | GABAergic synapse                                      | 6 | 9.40E-01 | 1.00E+00 |
| KEGG_PATHWAY | Systemic lupus erythematosus                           | 6 | 1.00E+00 | 1.00E+00 |

**GOTERM biological processes using default *Bos. taurus* background gene list of DAVID**

|                  |                                                                      |    |          |          |
|------------------|----------------------------------------------------------------------|----|----------|----------|
| GOTERM_BP_DIRECT | G-protein coupled receptor signaling pathway                         | 84 | 4.80E-01 | 1.00E+00 |
| GOTERM_BP_DIRECT | transcription, DNA-templated                                         | 77 | 1.20E-01 | 1.00E+00 |
| GOTERM_BP_DIRECT | regulation of transcription, DNA-templated                           | 60 | 8.50E-01 | 1.00E+00 |
| GOTERM_BP_DIRECT | positive regulation of transcription from RNA polymerase II promoter | 51 | 9.80E-01 | 1.00E+00 |
| GOTERM_BP_DIRECT | negative regulation of transcription from RNA polymerase II promoter | 42 | 8.20E-01 | 1.00E+00 |
| GOTERM_BP_DIRECT | intracellular signal transduction                                    | 35 | 2.70E-01 | 1.00E+00 |
| GOTERM_BP_DIRECT | signal transduction                                                  | 35 | 9.60E-01 | 1.00E+00 |
| GOTERM_BP_DIRECT | cell differentiation                                                 | 31 | 1.70E-01 | 1.00E+00 |
| GOTERM_BP_DIRECT | inflammatory response                                                | 30 | 1.50E-01 | 1.00E+00 |
| GOTERM_BP_DIRECT | innate immune response                                               | 30 | 2.30E-01 | 1.00E+00 |
| GOTERM_BP_DIRECT | sensory perception of smell                                          | 27 | 2.10E-01 | 1.00E+00 |
| GOTERM_BP_DIRECT | protein homooligomerization                                          | 26 | 3.80E-03 | 1.00E+00 |
| GOTERM_BP_DIRECT | translation                                                          | 25 | 1.30E-01 | 1.00E+00 |
| GOTERM_BP_DIRECT | negative regulation of cell proliferation                            | 25 | 5.30E-01 | 1.00E+00 |
| GOTERM_BP_DIRECT | negative regulation of transcription, DNA-templated                  | 25 | 8.30E-01 | 1.00E+00 |
| GOTERM_BP_DIRECT | DNA repair                                                           | 24 | 2.30E-03 | 1.00E+00 |

|                                                                                                                                                                    |                                                             |    |          |          |
|--------------------------------------------------------------------------------------------------------------------------------------------------------------------|-------------------------------------------------------------|----|----------|----------|
| GOTERM_BP_DIRECT                                                                                                                                                   | positive regulation of ERK1 and ERK2 cascade                | 24 | 1.50E-02 | 1.00E+00 |
| GOTERM_BP_DIRECT                                                                                                                                                   | cell proliferation                                          | 24 | 4.60E-02 | 1.00E+00 |
| GOTERM_BP_DIRECT                                                                                                                                                   | cell adhesion                                               | 24 | 2.00E-01 | 1.00E+00 |
| GOTERM_BP_DIRECT                                                                                                                                                   | intracellular protein transport                             | 24 | 2.10E-01 | 1.00E+00 |
| GOTERM_BP_DIRECT                                                                                                                                                   | negative regulation of apoptotic process                    | 24 | 8.30E-01 | 1.00E+00 |
| GOTERM_BP_DIRECT                                                                                                                                                   | small GTPase mediated signal transduction                   | 23 | 5.30E-01 | 1.00E+00 |
| GOTERM_BP_DIRECT                                                                                                                                                   | spermatogenesis                                             | 22 | 5.10E-01 | 1.00E+00 |
| GOTERM_BP_DIRECT                                                                                                                                                   | apoptotic process                                           | 22 | 6.60E-01 | 1.00E+00 |
| GOTERM_BP_DIRECT                                                                                                                                                   | immune response                                             | 22 | 7.50E-01 | 1.00E+00 |
| GOTERM_BP_DIRECT                                                                                                                                                   | positive regulation of transcription, DNA-templated         | 22 | 9.40E-01 | 1.00E+00 |
| GOTERM_BP_DIRECT                                                                                                                                                   | positive regulation of cell proliferation                   | 22 | 9.50E-01 | 1.00E+00 |
| GOTERM_BP_DIRECT                                                                                                                                                   | cell surface receptor signaling pathway                     | 21 | 2.40E-01 | 1.00E+00 |
| GOTERM_BP_DIRECT                                                                                                                                                   | regulation of transcription from RNA polymerase II promoter | 21 | 9.40E-01 | 1.00E+00 |
| GOTERM_BP_DIRECT                                                                                                                                                   | protein autophosphorylation                                 | 19 | 9.00E-02 | 1.00E+00 |
| <b>Pathways classified for gene list common between this study, and previous transcriptomics and proteomics studies on puberty of Brahman heifers by our group</b> |                                                             |    |          |          |
| KEGG_PATHWAY                                                                                                                                                       | Metabolic pathways                                          | 48 | 3.40E-03 | 1.90E-01 |
| KEGG_PATHWAY                                                                                                                                                       | Pathways in cancer                                          | 16 | 9.30E-02 | 6.50E-01 |
| KEGG_PATHWAY                                                                                                                                                       | Biosynthesis of antibiotics                                 | 15 | 9.00E-04 | 1.90E-01 |
| KEGG_PATHWAY                                                                                                                                                       | Proteoglycans in cancer                                     | 14 | 2.30E-03 | 1.90E-01 |
| KEGG_PATHWAY                                                                                                                                                       | Ras signaling pathway                                       | 12 | 4.20E-02 | 4.30E-01 |
| KEGG_PATHWAY                                                                                                                                                       | PI3K-Akt signaling pathway                                  | 12 | 2.90E-01 | 9.30E-01 |
| KEGG_PATHWAY                                                                                                                                                       | Calcium signaling pathway                                   | 11 | 2.50E-02 | 3.20E-01 |
| KEGG_PATHWAY                                                                                                                                                       | cAMP signaling pathway                                      | 11 | 3.30E-02 | 4.00E-01 |
| KEGG_PATHWAY                                                                                                                                                       | Oxytocin signaling pathway                                  | 10 | 1.30E-02 | 2.80E-01 |
| KEGG_PATHWAY                                                                                                                                                       | Chemokine signaling pathway                                 | 10 | 5.10E-02 | 4.40E-01 |
| KEGG_PATHWAY                                                                                                                                                       | Neuroactive ligand-receptor interaction                     | 10 | 3.50E-01 | 9.90E-01 |
| KEGG_PATHWAY                                                                                                                                                       | Circadian entrainment                                       | 9  | 3.60E-03 | 1.90E-01 |
| KEGG_PATHWAY                                                                                                                                                       | Vascular smooth muscle contraction                          | 9  | 1.20E-02 | 2.80E-01 |
| KEGG_PATHWAY                                                                                                                                                       | FoxO signaling pathway                                      | 9  | 2.10E-02 | 3.20E-01 |
| KEGG_PATHWAY                                                                                                                                                       | Protein processing in endoplasmic reticulum                 | 9  | 7.30E-02 | 5.50E-01 |
| KEGG_PATHWAY                                                                                                                                                       | Focal adhesion                                              | 9  | 1.70E-01 | 8.20E-01 |
| KEGG_PATHWAY                                                                                                                                                       | Regulation of actin cytoskeleton                            | 9  | 1.90E-01 | 8.30E-01 |
| KEGG_PATHWAY                                                                                                                                                       | Rap1 signaling pathway                                      | 9  | 1.90E-01 | 8.30E-01 |
| KEGG_PATHWAY                                                                                                                                                       | Estrogen signaling pathway                                  | 8  | 1.40E-02 | 2.80E-01 |
| KEGG_PATHWAY                                                                                                                                                       | Retrograde endocannabinoid signaling                        | 8  | 1.80E-02 | 3.20E-01 |
| KEGG_PATHWAY                                                                                                                                                       | Carbon metabolism                                           | 8  | 2.30E-02 | 3.20E-01 |
| KEGG_PATHWAY                                                                                                                                                       | Platelet activation                                         | 8  | 4.70E-02 | 4.30E-01 |
| KEGG_PATHWAY                                                                                                                                                       | Dopaminergic synapse                                        | 8  | 4.90E-02 | 4.30E-01 |

|              |                                                  |   |          |          |
|--------------|--------------------------------------------------|---|----------|----------|
| KEGG_PATHWAY | Adrenergic signaling in cardiomyocytes           | 8 | 6.30E-02 | 5.20E-01 |
| KEGG_PATHWAY | Purine metabolism                                | 8 | 1.70E-01 | 8.20E-01 |
| KEGG_PATHWAY | MAPK signaling pathway                           | 8 | 4.90E-01 | 1.00E+00 |
| KEGG_PATHWAY | Long-term depression                             | 7 | 4.10E-03 | 1.90E-01 |
| KEGG_PATHWAY | Glioma                                           | 7 | 6.60E-03 | 2.20E-01 |
| KEGG_PATHWAY | Long-term potentiation                           | 7 | 6.60E-03 | 2.20E-01 |
| KEGG_PATHWAY | GnRH signaling pathway                           | 7 | 2.40E-02 | 3.20E-01 |
| KEGG_PATHWAY | ErbB signaling pathway                           | 7 | 2.40E-02 | 3.20E-01 |
| KEGG_PATHWAY | Glutamatergic synapse                            | 7 | 7.30E-02 | 5.50E-01 |
| KEGG_PATHWAY | Axon guidance                                    | 7 | 1.10E-01 | 6.70E-01 |
| KEGG_PATHWAY | Hepatitis C                                      | 7 | 1.30E-01 | 7.20E-01 |
| KEGG_PATHWAY | cGMP-PKG signaling pathway                       | 7 | 2.30E-01 | 9.00E-01 |
| KEGG_PATHWAY | Influenza A                                      | 7 | 2.90E-01 | 9.30E-01 |
| KEGG_PATHWAY | Alzheimer's disease                              | 7 | 3.20E-01 | 9.70E-01 |
| KEGG_PATHWAY | Tuberculosis                                     | 7 | 3.30E-01 | 9.70E-01 |
| KEGG_PATHWAY | Biosynthesis of amino acids                      | 6 | 3.70E-02 | 4.20E-01 |
| KEGG_PATHWAY | Prostate cancer                                  | 6 | 7.20E-02 | 5.50E-01 |
| KEGG_PATHWAY | Glycerophospholipid metabolism                   | 6 | 1.10E-01 | 6.70E-01 |
| KEGG_PATHWAY | Inflammatory mediator regulation of TRP channels | 6 | 1.30E-01 | 7.20E-01 |
| KEGG_PATHWAY | Serotonergic synapse                             | 6 | 1.80E-01 | 8.30E-01 |
| KEGG_PATHWAY | Neurotrophin signaling pathway                   | 6 | 2.20E-01 | 8.90E-01 |
| KEGG_PATHWAY | Spliceosome                                      | 6 | 2.40E-01 | 9.00E-01 |
| KEGG_PATHWAY | Ribosome                                         | 6 | 2.70E-01 | 9.20E-01 |
| KEGG_PATHWAY | Parkinson's disease                              | 6 | 3.60E-01 | 9.90E-01 |
| KEGG_PATHWAY | Huntington's disease                             | 6 | 5.90E-01 | 1.00E+00 |
| KEGG_PATHWAY | Cytokine-cytokine receptor interaction           | 6 | 6.70E-01 | 1.00E+00 |
| KEGG_PATHWAY | Viral carcinogenesis                             | 6 | 7.30E-01 | 1.00E+00 |
| KEGG_PATHWAY | HTLV-I infection                                 | 6 | 8.30E-01 | 1.00E+00 |
| KEGG_PATHWAY | Nicotine addiction                               | 5 | 2.30E-02 | 3.20E-01 |
| KEGG_PATHWAY | NOD-like receptor signaling pathway              | 5 | 4.30E-02 | 4.30E-01 |
| KEGG_PATHWAY | Amphetamine addiction                            | 5 | 9.60E-02 | 6.50E-01 |
| KEGG_PATHWAY | PPAR signaling pathway                           | 5 | 1.10E-01 | 6.70E-01 |
| KEGG_PATHWAY | Melanoma                                         | 5 | 1.20E-01 | 6.90E-01 |
| KEGG_PATHWAY | Chronic myeloid leukemia                         | 5 | 1.20E-01 | 6.90E-01 |
| KEGG_PATHWAY | Aldosterone synthesis and secretion              | 5 | 1.50E-01 | 7.50E-01 |
| KEGG_PATHWAY | Progesterone-mediated oocyte maturation          | 5 | 1.90E-01 | 8.30E-01 |
| KEGG_PATHWAY | Morphine addiction                               | 5 | 2.20E-01 | 8.90E-01 |
| KEGG_PATHWAY | HIF-1 signaling pathway                          | 5 | 2.40E-01 | 9.00E-01 |
| KEGG_PATHWAY | Phosphatidylinositol signaling system            | 5 | 2.50E-01 | 9.00E-01 |
| KEGG_PATHWAY | Pyrimidine metabolism                            | 5 | 2.50E-01 | 9.00E-01 |
| KEGG_PATHWAY | T cell receptor signaling pathway                | 5 | 2.90E-01 | 9.30E-01 |
| KEGG_PATHWAY | Cholinergic synapse                              | 5 | 3.20E-01 | 9.70E-01 |
| KEGG_PATHWAY | Epstein-Barr virus infection                     | 5 | 3.70E-01 | 9.90E-01 |
| KEGG_PATHWAY | Insulin signaling pathway                        | 5 | 4.70E-01 | 1.00E+00 |



|              |                                         |   |          |          |
|--------------|-----------------------------------------|---|----------|----------|
| KEGG_PATHWAY | Wnt signaling pathway                   | 5 | 4.80E-01 | 1.00E+00 |
| KEGG_PATHWAY | Measles                                 | 5 | 5.00E-01 | 1.00E+00 |
| KEGG_PATHWAY | Cell adhesion molecules (CAMs)          | 5 | 5.70E-01 | 1.00E+00 |
| KEGG_PATHWAY | Phagosome                               | 5 | 5.90E-01 | 1.00E+00 |
| KEGG_PATHWAY | Transcriptional misregulation in cancer | 5 | 6.50E-01 | 1.00E+00 |
| KEGG_PATHWAY | Endocytosis                             | 5 | 8.80E-01 | 1.00E+00 |
| KEGG_PATHWAY | 2-Oxocarboxylic acid metabolism         | 4 | 1.10E-02 | 2.80E-01 |
| KEGG_PATHWAY | Citrate cycle (TCA cycle)               | 4 | 4.20E-02 | 4.30E-01 |
| KEGG_PATHWAY | Thyroid cancer                          | 4 | 4.50E-02 | 4.30E-01 |
| KEGG_PATHWAY | Bladder cancer                          | 4 | 8.50E-02 | 6.10E-01 |
| KEGG_PATHWAY | Proteasome                              | 4 | 1.20E-01 | 6.90E-01 |
| KEGG_PATHWAY | Ether lipid metabolism                  | 4 | 1.20E-01 | 6.90E-01 |
| KEGG_PATHWAY | Ovarian steroidogenesis                 | 4 | 1.40E-01 | 7.30E-01 |
| KEGG_PATHWAY | Non-small cell lung cancer              | 4 | 1.80E-01 | 8.20E-01 |
| KEGG_PATHWAY | VEGF signaling pathway                  | 4 | 2.00E-01 | 8.30E-01 |
| KEGG_PATHWAY | Glycerolipid metabolism                 | 4 | 2.20E-01 | 8.90E-01 |
| KEGG_PATHWAY | Pancreatic cancer                       | 4 | 2.40E-01 | 9.00E-01 |
| KEGG_PATHWAY | Fc epsilon RI signaling pathway         | 4 | 2.50E-01 | 9.00E-01 |
| KEGG_PATHWAY | Adherens junction                       | 4 | 2.60E-01 | 9.10E-01 |
| KEGG_PATHWAY | Inositol phosphate metabolism           | 4 | 2.80E-01 | 9.30E-01 |
| KEGG_PATHWAY | Adipocytokine signaling pathway         | 4 | 2.80E-01 | 9.30E-01 |
| KEGG_PATHWAY | Antigen processing and presentation     | 4 | 3.10E-01 | 9.60E-01 |
| KEGG_PATHWAY | Pertussis                               | 4 | 3.20E-01 | 9.70E-01 |
| KEGG_PATHWAY | Hypertrophic cardiomyopathy (HCM)       | 4 | 3.40E-01 | 9.90E-01 |
| KEGG_PATHWAY | Insulin secretion                       | 4 | 3.60E-01 | 9.90E-01 |
| KEGG_PATHWAY | TGF-beta signaling pathway              | 4 | 3.70E-01 | 9.90E-01 |
| KEGG_PATHWAY | Salmonella infection                    | 4 | 3.70E-01 | 9.90E-01 |
| KEGG_PATHWAY | Fc gamma R-mediated phagocytosis        | 4 | 3.80E-01 | 1.00E+00 |
| KEGG_PATHWAY | GABAergic synapse                       | 4 | 3.90E-01 | 1.00E+00 |
