# Supplementary material for: Meta-Analysis of Heifer Traits Identified Reproductive Pathways in Bos indicus Cattle
Source: MDPI journal article supplement (doi:10.3390/genes12050768), 2021-05-18
Supplement: s1 [file s1]

**Table S1: Distribution of animals for combined datasets of early reproductive trait**

| <b>No.</b> | <b>Traits</b> | <b>Dataset</b> | <b>Animals</b> | <b>Trait Score</b> | <b>Distribution of Animals</b> |
|------------|---------------|----------------|----------------|--------------------|--------------------------------|
| 1          | PREG-1        | CRC            | 932            | 1                  | 261                            |
|            |               |                |                | 2                  | 671                            |
|            |               | Kamilaroi      | 1208           | 1                  | 211                            |
|            |               |                |                | 2                  | 997                            |
|            |               | NTDPI          | 179            | 1                  | 128                            |
|            |               |                |                | 2                  | 51                             |
|            |               | <b>Total</b>   | <b>3</b>       |                    | <b>2319</b>                    |
|            |               |                |                |                    |                                |
| 2          | FCS           | CRC            | 929            | 1                  | 230                            |
|            |               |                |                | 2                  | 41                             |
|            |               |                |                | 3                  | 658                            |
|            |               | Kamilaroi      | 1086           | 1                  | 199                            |
|            |               |                |                | 2                  | 395                            |
|            |               |                |                | 3                  | 492                            |
|            |               | <b>Total</b>   | <b>2</b>       |                    | <b>2015</b>                    |
|            |               |                |                |                    |                                |
| 3          | REB           | CRC            | 932            | 1                  | 26                             |
|            |               |                |                | 2                  | 235                            |
|            |               |                |                | 2.5                | 387                            |
|            |               |                |                | 3.5                | 284                            |
|            |               |                |                | 1                  | 116                            |
|            |               |                |                | 2                  | 198                            |
|            |               | Kamilaroi      | 424            | 2.5                | 103                            |
|            |               |                |                | 3.5                | 7                              |
|            |               |                |                | 1                  | 11                             |
|            |               |                |                | 2                  | 117                            |
|            |               |                |                | 2.5                | 16                             |
|            |               |                |                | 3.5                | 35                             |
|            |               | <b>Total</b>   | <b>3</b>       |                    | <b>1535</b>                    |
